# Supplementary material
Source: HighWire-hosted journal article supplement (https://rc.rcjournal.com/highwire/filestream/24166/field_highwire_adjunct_files/0/rc-10353-File001.pdf)
Supplement: rc-10353-File001.pdf [file rc-10353-File001.pdf]

# AFCH NEUROMUSCULAR DISORDERS (NMD) PROTOCOL

## A. Definition of Therapy:

1. *Cough machine*: 4 sets of 5 breaths with a goal of I:E pressures approximately the same of 30-40. Inhale time = 1 second, exhale time = 1 second, pause time = 2 seconds.  
If the patient is  $\geq 6$  years of age, attempt to use a mouthpiece, otherwise, use a mask.  
If the patient is less than 1 year of age, decrease pause time to 1 second.
2. *Airway Clearance Therapy (ACT)*
  - a. *Chest Percussion Physiotherapy (CPT)*: side to side with HOB down.
  - b. *Intrapulmonary Percussive Ventilation (IPV)*: adjust frequency as tolerated using normal saline solution nebulized.
3. *Postural drainage*: supine with head of bed (HOB) down for 15 minutes or as tolerated.

## B. Assessment

1. Patient assessment will be performed upon admission and daily 1 hour after the morning therapy using the triage scoring tool.
2. All assessments are to be done on room air and without respiratory support. If unable to score the patient off respiratory support, the patient immediate triages to total points of  $>16$ .
3. Triage scoring (total points) will determine the frequency. See Frequency Guidelines.
4. When the triage score is 0-4:
  - a. If the patient is on home therapies, assess the patient every day.
  - b. If the patient has no home therapies, assess the patient every shift for 48 hours.

## C. Oxygenation

If oxygen saturation drops to  $< 93\%$  acutely, perform cough machine and assess if the patient needs an extra treatment. The cough machine can be used as often as needed to clear lower airway secretions. If on room air (RA) and SpO<sub>2</sub> remains  $\leq 93\%$ , apply respiratory support device (BiPAP or ventilator). If SpO<sub>2</sub> remains  $\leq 92\%$ , apply supplemental oxygen to respiratory support device and reassess frequency of therapy. If patient is requiring supplemental oxygen, oxygen should be added to the cough machine.

## D. Health link

Order will be written for “Respiratory Therapy per Protocol, protocol type Neuromuscular”.

Name:

Date:

**NEUROMUSCULAR DISORDERS (NMD) TRIAGE SCORING**

Assess on room air and without respiratory support upon admission and 1 hour after morning treatment. **If unable to assess off respiratory support, immediate triage to >16.**

| Points                                                                 | 0              | 1                       | 2                                              | 3                                | Total Points |
|------------------------------------------------------------------------|----------------|-------------------------|------------------------------------------------|----------------------------------|--------------|
| <b>Respiratory Rate</b><br>0-9years of age<br>≥10 years of age         | 20-30<br>15-20 | 31-40<br>21-30          | 41-50<br>31-40                                 | >50<br>>40                       |              |
| <b>Heart Rate</b>                                                      | 80-100         | 100-120                 | 120-140                                        | >140                             |              |
| <b>RA Pulse Ox</b>                                                     | >94%           | 94%-91%                 | 90%-85%                                        | <85%                             |              |
| <b>FI02</b>                                                            | Room Air       | ≤lpm                    | 1.1 lpm-3lpm                                   | >3lpm                            |              |
| <b>Breath Sounds</b>                                                   | Clear          | Decreased Unilaterally  | Crackles                                       | Decreased Bilaterally            |              |
| <b>Color</b>                                                           | Normal         | Pale                    | Cyanotic                                       | Diffuse Cyanosis                 |              |
| <b>CXR (if none on day of assessment-continue with previous score)</b> | Clear          | Infiltrates atelectasis | Infiltrates more than 1 lobe or lobar collapse | Unilateral or bilateral whiteout |              |
| <b>WOB</b>                                                             | Normal         | Nasal Flaring           | Retractions                                    | Grunting and Flaring             |              |
| <b>Secretions</b><br>With cough machine.                               | None           | Scant amounts           | Moderate amounts                               | Copious amounts                  |              |
| <b>Mental State</b>                                                    | Alert          | Sleepy                  | Lethargic and arousable                        | Lethargic and not arousable      |              |
| <b>Cough</b>                                                           | None           | Rare                    | Occasional                                     | Frequent                         |              |

**FREQUENCY GUIDELINES**

| Total Points | Biphasic positive airway pressure | Treatments                                                                                                                           |
|--------------|-----------------------------------|--------------------------------------------------------------------------------------------------------------------------------------|
| ≥16 points   | Continuously                      | Every 2 hours (cough assist-ACT-cough assist-drainage-cough assist; oral suction as needed)<br>Cough assist every 2 hours as needed  |
| 11-15 points | 4 hours off twice daily           | Every 4 hours (cough assist-ACT-cough assist-drainage-cough assist; oral suction as needed)<br>Cough assist every 2 hours as needed. |
| 5-10 points  | at night only                     | 4 times daily (cough assist-ACT-cough assist-drainage-cough assist; oral suction as needed)                                          |
| 0-4 points   | Baseline                          | As needed (cough assist-ACT-cough assist-drainage-cough assist; oral suction as needed) or home therapy regimen                      |

If treatment frequency is different than triage score indicate why.

\_\_\_ RCP discretion \_\_\_ MD discretion Who and Why

## **I. Nonintubated Patient**

### **A. Protocol**

1. Initial Protocol
  - a. Cough machine +/- manual cough assist per patient preference and tolerance, then orally suction.
  - b. Airway clearance with IPV or CPT or vest
  - c. Cough machine +/- manual cough assist per patient preference and tolerance, then orally suction.
  - d. Postural drainage for 15minutes as tolerated.
  - e. Cough machine +/- manual cough assist per patient preference and tolerance, then orally suction.
2. 48 Hours (2 days) of q2 hour therapy and no improvement based on assessment:
  - a. Evaluate CXR with attending physician:
    - i. If airspace disease present and/or airway clearance is not tolerated by patient, decrease frequency of therapy.
    - ii. If atelectasis and mucus plugging present then therapy will be performed every two hour. Change mode of airway clearance.
  - b. Consider decreasing frequency during sleep with attending physician.
3. 72 Hours (3 days) of q2 hour therapy and no improvement based on assessment:
  - a. Evaluate CXR with attending physician:
    - i. If airspace disease present and/or airway clearance is not tolerated by patient, consider decreasing frequency of therapy.
    - ii. If atelectasis and mucus plugging present then therapy will be performed every two hour. Alternate modes of airway clearance.
  - b. Consider decreasing frequency during sleep with attending physician.
4. 96 Hours (4 days) of q2 hour therapy and no improvement based on assessment:
  - a. Evaluate CXR with attending physician:
    - i. If airspace disease present and/or airway clearance is not tolerated by patient, decrease frequency of therapy to q3 hour.
    - ii. If atelectasis and mucus plugging present alternate modes of airway clearance, decrease frequency of therapy to q3 hour.
  - b. Consider decreasing frequency during sleep with attending physician.
5. 120 Hours (5 days) of q3 hour therapy and no improvement based on assessment:
  - a. Evaluate CXR with attending physician:
    - i. If airspace disease present and/or airway clearance is not tolerated by patient, decrease frequency of therapy to q4 hour.
    - ii. If atelectasis and mucus plugging present alternate modes of airway clearance, decrease frequency of therapy to q4 hour.
    - iii. Consider Pulmozyme or Mucomyst.
    - iv. Consider Bronchoscopy.
  - b. Consider decreasing frequency during sleep with attending physician.

### **B. Post-operative Patient**

Provide treatments within one hour after returning from surgery and continue every 4 hours until following am. Reassess in am for treatment schedule to return to baseline.

## II. Intubated Patient

Intubated patients do not have assessments using the triage tool and fall into one of two categories; those intubated for post operative care and those intubated for respiratory failure.

### A. Post-operative Patient

Provide treatments within one hour after returning from surgery and continue every 4 hours in the following sequence:

- a. Cough machine set at inhale pressure +40 for 1 second, exhale pressure – 40 for 1 second and 2 second pause, 4 sets of 5 breaths. Bleed in oxygen to cough machine if requiring supplemental oxygen.
- b. Endotracheal tube and nasal suctioning.
- c. Intrapulmonary percussive ventilation (IPV).
- d. Cough machine set at inhale pressure +40 for 1 second, exhale pressure – 40 for 1 second and 2 second pause, 4 sets of 5 breaths. Bleed in oxygen to cough machine if requiring supplemental oxygen.
- e. Endotracheal tube and nasal suctioning.

### B. Respiratory Failure Patient

1. Therapy will be performed every two hours in the following sequence:

- a. Cough machine set at inhale pressure +40 for 1 second, exhale pressure – 40 for 1 second and 2 second pause, 4 sets of 5 breaths. Bleed in oxygen to cough machine if requiring supplemental oxygen.
- b. Endotracheal tube and nasal suctioning.
- c. Intrapulmonary percussive ventilation (IPV).
- d. Cough machine set at inhale pressure +40 for 1 second, exhale pressure – 40 for 1 second and 2 second pause, 4 sets of 5 breaths. Bleed in oxygen to cough machine if requiring supplemental oxygen.
- e. Endotracheal tube and nasal suctioning.

2. 48 Hours post intubation and no improvement in ventilator settings or CXR:

- a. Evaluate CXR with attending physician:
  - i. If airspace disease present and/or airway clearance is not tolerated by patient, consider decreasing frequency of therapy.
  - ii. If atelectasis and mucus plugging present then therapy will be performed every two hours in the following sequence:
    - a. Cough machine set at inhale pressure +40 for 1 second, exhale pressure –40 for 1 second and 2 second pause, 4 sets of 5 breaths.
    - b. Endotracheal tube and nasal suctioning.
    - c. CPT or high frequency chest wall compressions (vest) therapy (don't use for children under the of 2)
    - d. Cough machine set at inhale pressure +40 for 1 second, exhale pressure –40 for 1 second and 2 second pause, 4 sets of 5 breaths.
    - e. Endotracheal tube and nasal suctioning.
    - f. Evaluate for drainage.
- b. Consider decreasing frequency during sleep with attending physician.

3. 96 Hours post intubation and no improvement in ventilator settings or CXR, therapy will be performed every two hours in the following sequence:
  - a. Cough machine set at inhale pressure +40 for 1 second, exhale pressure –40 for 1 second and 2 second pause, 4 sets of 5 breaths.
  - b. Endotracheal tube and nasal suctioning.
  - c. Alternate IPV and CPT or high frequency chest wall compressions (vest) therapy every other treatment.
  - d. Cough machine set at inhale pressure +40 for 1 second, exhale pressure –40 for 1 second and 2 second pause, 4 sets of 5 breaths.
  - e. Endotracheal tube and nasal suctioning.
  - f. Evaluate for drainage.
  - g. Recruitment Maneuver.
  - h. Consider Pulmozyme or Mucomyst.
  - i. Consider Bronchoscopy.
  - j. Consider decreasing frequency during sleep with attending physician.

**C. Wean**

4. Wean per the ventilator management protocols.
5. Work toward the following prior to extubation:
  - a. Afebrile.
  - b. Not requiring supplemental O<sub>2</sub>.
  - c. CXR is without atelectasis or infiltrates.
  - d. Off respiratory depressants.
  - e. Airway suctioning is 3-4 times/8 hours or less.

**D. Extubation**

1. Extubate to continuous nasal ventilation and no supplemental O<sub>2</sub> such as BiPAP with settings IPAP 14-20 (15) and EPAP 3-6 (5) using the spontaneous timed (S/T) mode with a backup rate to match the patient’s respiratory rate.

| <u>Age</u> | <u>Respiratory Rate</u> | <u>Normal Predicted</u> | <u>Inspiratory Time (seconds)</u> |
|------------|-------------------------|-------------------------|-----------------------------------|
| <2         | 30                      | 20-25                   | .5-.8                             |
| 2-5        | 20                      | 15-20                   | .8-1                              |
| >5         | 16                      | 12-15                   | 1                                 |

2. If oxygen saturation drops to < 93% acutely, perform cough machine and assess if the patient needs an extra treatment. The cough machine can be used as often as needed to clear lower airway secretions. If on room air (RA) and SpO<sub>2</sub> remains ≤93%, apply respiratory support device (NIV or ventilator). If SpO<sub>2</sub> remains ≤92%, apply supplemental oxygen to respiratory support device and reassess frequency of therapy. If patient is requiring supplemental oxygen, oxygen should be added to the cough machine.

3. Follow the normal therapy regime according to triage scoring and frequency guidelines. The goal is to use NIV (BiPAP) per nasal mask while sleeping only.

**E. Initial settings for specific device:**

**1. LTV ventilator**

- a. SIMV PC: Rate-age based, PC based on peak inspiratory pressure from mechanical ventilator, pressure support adequate to generate a tidal volume of 10ml/kg, PEEP 4, inspiratory time based on age.
- b. Do not use NIV mode.
- c. Use Respronics mask with a swivel (not an exhalation whisper swivel).
- d. The low VE alarm may need to be turned off due to leakage. Set all other alarms appropriately.
- e. **Assess triggering and synchronization** and fine-tune adjustable settings.
- f. If on RA and SpO<sub>2</sub> ≤93%: Increase the peak inspiratory pressure by 2 to a maximum of 20 cm H<sub>2</sub>O.

**2. Vision BiPAP**

- a. ST mode, 15/5 with backup rate set to patient's normal predicted.
- b. **Assess triggering and synchronization** and fine-tune adjustable settings.
- c. If on RA and SpO<sub>2</sub> ≤93%:  
Increase the peak inspiratory pressure by 2 to a maximum of 20cm H<sub>2</sub>O.

Appendix: Abbreviation Table

+, positive

-, negative

ACT, airway clearance technique

CXR, chest xray

EPAP, expiratory positive airway pressure

I:E, inspiratory to expiratory

IPAP, inspiratory positive airway pressure

LTV, lap top ventilator

ml/kg, milliliters per kilogram

NIV, noninvasive ventilation

O<sub>2</sub>, oxygen

RA, Room Air

SIMV/PC, synchronized intermittent mechanical ventilation with pressure control SpO<sub>2</sub>, saturated partial oxygen concentration

S/T, spontaneous timed

VE, minute ventilation

WOB, work of breathing
